# Supplementary material
Source: PubMed Central journal article supplement (PMC2442566)

**Supplementary Table 1: Crystallographic and refinement statistics for native BPS1**

| Sequence                                                  | BPS1 (native)<br>5'-G C G C G $\psi$ A G U A G C<br>G C G C <u>A</u> U C A U C G C - 5' |
|-----------------------------------------------------------|-----------------------------------------------------------------------------------------|
| <b>A: Data collection statistics</b>                      |                                                                                         |
| Wavelength (Å)                                            | 1.54 Å                                                                                  |
| Space group                                               | C2                                                                                      |
| Unit cell parameters                                      |                                                                                         |
| a (Å)                                                     | 68.70                                                                                   |
| b (Å)                                                     | 41.01                                                                                   |
| c (Å)                                                     | 32.97                                                                                   |
| $\beta$ (°)                                               | 94.79                                                                                   |
| Resolution limit (Å)                                      | 2.55                                                                                    |
| Observed reflections                                      | 20,601                                                                                  |
| Unique reflections                                        | 3,027                                                                                   |
| Completeness <sup>a</sup> (%)                             | 99.5 (100.0)                                                                            |
| $I/\sigma(I)$ <sup>a</sup>                                | 44.1 (16.5)                                                                             |
| Redundancy <sup>a</sup>                                   | 6.8 (6.0)                                                                               |
| $R_{\text{sym}}^{\text{a,b}}$ (%)                         | 5.3 (10.8)                                                                              |
| <b>B: Refinement statistics</b>                           |                                                                                         |
| $R_{\text{cryst}}^{\text{c}}$ (%)                         | 19.3                                                                                    |
| $R_{\text{free}}^{\text{c}}$ (%)                          | 22.7                                                                                    |
| RMSD bond lengths (Å)                                     | 0.005                                                                                   |
| RMSD bond angles (°)                                      | 0.96                                                                                    |
| Coordinate error from cross-validated Luzzati plot (Å)    |                                                                                         |
| Coordinate error from cross-validated $\sigma_A$ plot (Å) |                                                                                         |
| No. RNA atoms                                             | 528                                                                                     |
| No. water atoms                                           | 49                                                                                      |
| No. sulfate ions                                          | 1                                                                                       |
| No. iodide ions                                           | 0                                                                                       |
| No. magnesium ions                                        | 0                                                                                       |
| Average B-factor                                          |                                                                                         |
| all atoms (Å <sup>2</sup> )                               | 15.1                                                                                    |
| RNA atoms (Å <sup>2</sup> )                               | 14.6                                                                                    |
| Water atoms (Å <sup>2</sup> )                             | 17.4                                                                                    |

<sup>a</sup> Values in parenthesis are for the highest resolution shell: 2.64-2.55 Å for BPS1

<sup>b</sup>  $R_{\text{merge}} = \sum_{hkl} \sum_i |I_i - \langle I \rangle| / \sum_{hkl} \sum_i I_i$ , where  $I_i$  is an intensity  $I$  for the  $i$ th measurement of a reflection with indices  $hkl$  and  $\langle I \rangle$  is the weighted mean of all measurements of  $I$ .

<sup>c</sup>  $R_{\text{cryst}} = \sum_{hkl} \sum_i |F_o(hkl) - k|F_c(hkl)| / \sum_{hkl} |F_o(hkl)|$  for the working set of reflections;  $R_{\text{free}}$  is  $R_{\text{cryst}}$  for 7% of the reflections excluded from the refinement

**SUPPLEMENTARY FIGURE 1.** Composite omit  $2|F_o|-|F_c|$  electron density maps shown at  $1\sigma$  contour level for the bulged adenosines of (A) BPS1, (B) BPS2, and (C) BPS3.

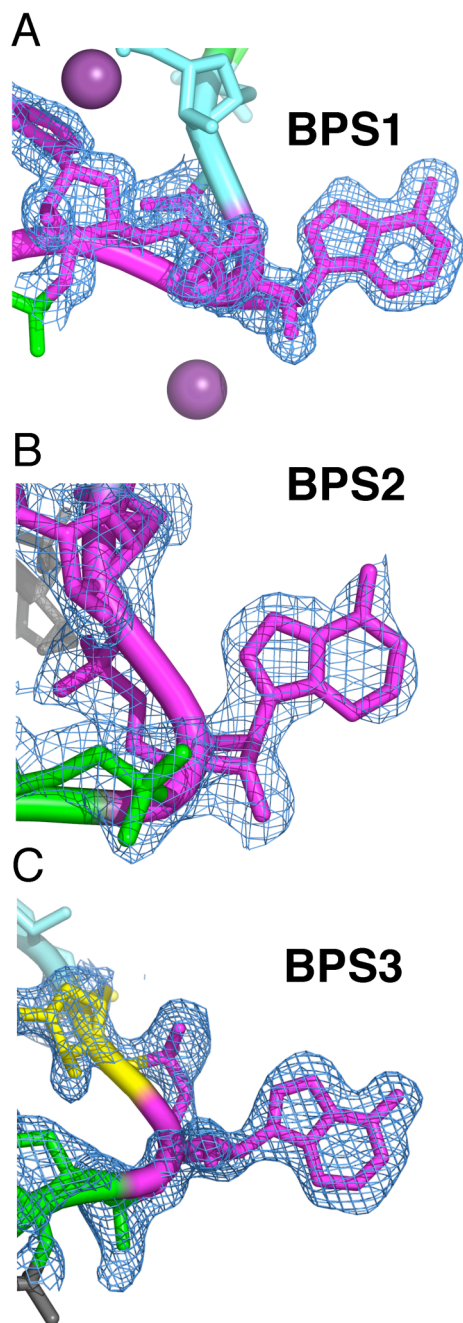

**SUPPLEMENTARY FIGURE 2.** Sulfate ions bound to junction of symmetry-related duplexes (distinguished by cyan and yellow coloring). An  $|F_o|-|F_c|$  omit electron density map for the sulfates is shown at  $3\sigma$  contour level. (A) BPS1. (B) BPS2.

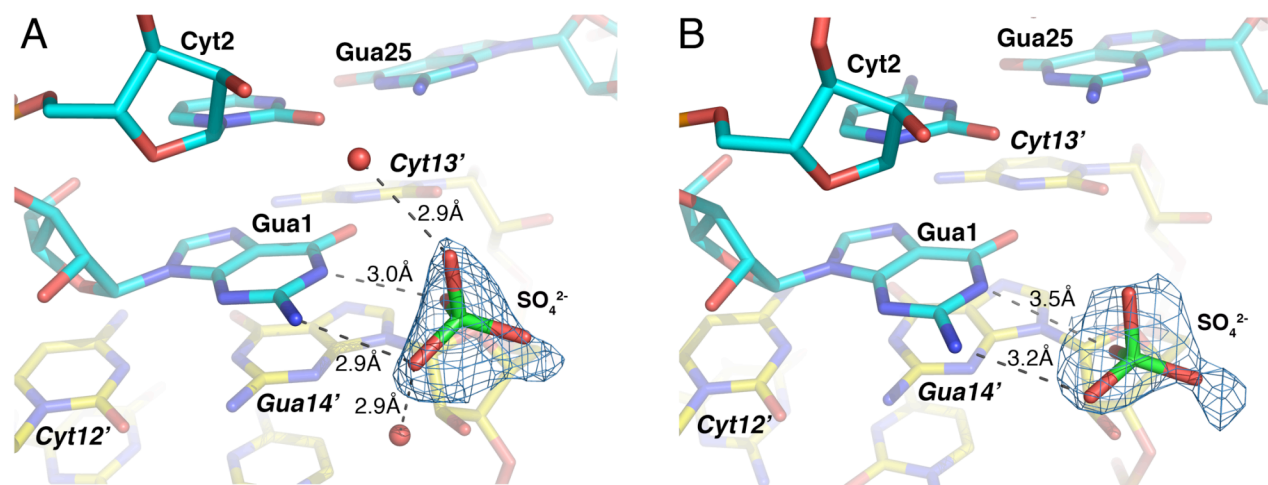

Supplement: NIHMS49014-supplement-1.pdf [file NIHMS49014-supplement-1.pdf]
